# Supplementary material for: Krempfielins J–M, New Eunicellin-Based Diterpenoids from the Soft Coral Cladiella krempfi
Source: MDPI journal article supplement (doi:10.3390/md11082741), 2013-08-02
Supplement: s1 [file s1]

marinedrugs-11-02741-s001.mol
  corina  04141402403D 1   1.00000     0.00000 
CORINA 3.49 0023  12.04.2013
 33 35  0  0  0  0  0  0  0  0999 V2000
   -0.0230    1.5413    0.0227 C   0  0  0  0  0  0  0  0  0  0  0  0
   -0.0165    0.0090    0.0082 C   0  0  0  0  0  0  0  0  0  0  0  0
    0.8129   -0.4989    1.1813 C   0  0  0  0  0  0  0  0  0  0  0  0
    2.2628   -0.0767    1.0750 C   0  0  0  0  0  0  0  0  0  0  0  0
    2.4199    1.4563    0.9487 C   0  0  0  0  0  0  0  0  0  0  0  0
    1.4048    2.0226   -0.0005 C   0  0  0  0  0  0  0  0  0  0  0  0
    2.8930   -0.5426   -0.2165 C   0  0  0  0  0  0  0  0  0  0  0  0
    3.7623    0.4612   -0.7466 O   0  0  0  0  0  0  0  0  0  0  0  0
    3.8209    1.5188    0.2474 C   0  0  0  0  0  0  0  0  0  0  0  0
    3.4987   -1.9346   -0.2681 C   0  0  0  0  0  0  0  0  0  0  0  0
    5.0391   -1.7976   -0.1719 C   0  0  0  0  0  0  0  0  0  0  0  0
    5.4914   -1.6124    1.2785 C   0  0  0  0  0  0  0  0  0  0  0  0
    6.6128   -0.5897    1.2989 C   0  0  0  0  0  0  0  0  0  0  0  0
    6.1847    0.8039    0.9133 C   0  0  0  0  0  0  0  0  0  0  0  0
    4.7665    1.0621    1.3671 C   0  0  0  0  0  0  0  0  0  0  0  0
    1.7639    2.9448   -0.8588 C   0  0  0  0  0  0  0  0  0  0  0  0
    0.2273    0.0552    2.4817 C   0  0  0  0  0  0  0  0  0  0  0  0
    2.8253   -0.4440    1.9334 H   0  0  0  0  0  0  0  0  0  0  0  0
    2.4030    1.9572    1.9167 H   0  0  0  0  0  0  0  0  0  0  0  0
    3.1225   -2.6124   -1.5872 C   0  0  0  0  0  0  0  0  0  0  0  0
   -1.2205   -0.4165    2.6307 C   0  0  0  0  0  0  0  0  0  0  0  0
    1.0524   -0.4482    3.6678 C   0  0  0  0  0  0  0  0  0  0  0  0
   -0.5506    1.9145   -0.8551 H   0  0  0  0  0  0  0  0  0  0  0  0
    4.0593    2.4963   -0.1718 H   0  0  0  0  0  0  0  0  0  0  0  0
    6.2600    0.9459   -0.5067 O   0  0  0  0  0  0  0  0  0  0  0  0
    7.1198    1.8210    1.5705 C   0  0  0  0  0  0  0  0  0  0  0  0
    2.0670   -0.5827   -0.9266 H   0  0  0  0  0  0  0  0  0  0  0  0
    7.1653   -0.5472    2.6161 O   0  0  0  0  0  0  0  0  0  0  0  0
    8.2446   -1.4605    2.8234 C   0  0  0  0  0  0  0  0  0  0  0  0
    3.0068   -2.7243    0.8467 O   0  0  0  0  0  0  0  0  0  0  0  0
    4.2273   -4.4181    0.1220 O   0  0  0  0  0  0  0  0  0  0  0  0
    3.4521   -3.9870    0.9425 C   0  0  0  0  0  0  0  0  0  0  0  0
    2.9853   -4.8668    2.0734 C   0  0  0  0  0  0  0  0  0  0  0  0
  1  2  1  0      
  2  3  1  0      
  3  4  1  0      
  4  5  1  0      
  5  6  1  0      
  6  1  1  0      
  4  7  1  0      
  7  8  1  0      
  8  9  1  0      
  9  5  1  0      
  7 10  1  0      
 10 11  1  0      
 11 12  1  0      
 12 13  1  0      
 13 14  1  0      
 14 15  1  0      
 15  9  1  0      
  6 16  2  0      
  3 17  1  0      
  4 18  1  0      
  5 19  1  0      
 10 20  1  0      
 17 21  1  0      
 17 22  1  0      
  1 23  1  0      
  9 24  1  0      
 14 25  1  0      
 14 26  1  0      
  7 27  1  0      
 28 29  1  0      
 13 28  1  0      
 10 30  1  0      
 30 32  1  0      
 31 32  2  0      
 32 33  1  0      
M  STY  1   1 SUP
M  SLB  1   1   1
M  SAL   1  2  28  29
M  SBL   1  1  31
M  SMT   1 OMe
M  SBV   1 31   -6.8520    6.0608
M  STY  1   2 SUP
M  SLB  1   2   2
M  SAL   2  4  30  31  32  33
M  SBL   2  1  32
M  SMT   2 OAc
M  SBV   2 32   -7.7175    5.0846
M  END
$$$$
