# Supplementary material for: Krempfielins J–M, New Eunicellin-Based Diterpenoids from the Soft Coral Cladiella krempfi
Source: MDPI journal article supplement (doi:10.3390/md11082741), 2013-08-02
Supplement: s2 [file s2]

marinedrugs-11-02741-s001.mol
  ChemDraw04141414392D

 33 35  0  0  0  0  0  0  0  0999 V2000
   -3.0124    0.3469    0.0000 C   0  0  0  0  0  0  0  0  0  0  0  0
   -3.0124   -0.4781    0.0000 C   0  0  0  0  0  0  0  0  0  0  0  0
   -2.2980   -0.8906    0.0000 C   0  0  0  0  0  0  0  0  0  0  0  0
   -1.5835   -0.4781    0.0000 C   0  0  0  0  0  0  0  0  0  0  0  0
   -1.5835    0.3469    0.0000 C   0  0  0  0  0  0  0  0  0  0  0  0
   -2.2980    0.7594    0.0000 C   0  0  0  0  0  0  0  0  0  0  0  0
   -0.7989   -0.7330    0.0000 C   0  0  0  0  0  0  0  0  0  0  0  0
   -0.3139   -0.0656    0.0000 O   0  0  0  0  0  0  0  0  0  0  0  0
   -0.7989    0.6019    0.0000 C   0  0  0  0  0  0  0  0  0  0  0  0
    0.1450   -1.6769    0.0000 C   0  0  0  0  0  0  0  0  0  0  0  0
    1.4799   -1.6769    0.0000 C   0  0  0  0  0  0  0  0  0  0  0  0
    2.4238   -0.7330    0.0000 C   0  0  0  0  0  0  0  0  0  0  0  0
    2.4238    0.6019    0.0000 C   0  0  0  0  0  0  0  0  0  0  0  0
    1.4799    1.5458    0.0000 C   0  0  0  0  0  0  0  0  0  0  0  0
    0.1450    1.5458    0.0000 C   0  0  0  0  0  0  0  0  0  0  0  0
   -2.2980    1.5844    0.0000 C   0  0  0  0  0  0  0  0  0  0  0  0
   -2.2980   -1.7156    0.0000 C   0  0  0  0  0  0  0  0  0  0  0  0
   -1.5835   -1.3031    0.0000 H   0  0  0  0  0  0  0  0  0  0  0  0
   -1.5835    1.1719    0.0000 H   0  0  0  0  0  0  0  0  0  0  0  0
   -0.4383   -2.2603    0.0000 C   0  0  0  0  0  0  0  0  0  0  0  0
   -3.0124   -2.1281    0.0000 C   0  0  0  0  0  0  0  0  0  0  0  0
   -1.5835   -2.1281    0.0000 C   0  0  0  0  0  0  0  0  0  0  0  0
   -3.7269    0.7594    0.0000 H   0  0  0  0  0  0  0  0  0  0  0  0
   -1.2114    1.3164    0.0000 H   0  0  0  0  0  0  0  0  0  0  0  0
    2.0633    2.1291    0.0000 O   0  0  0  0  0  0  0  0  0  0  0  0
    1.0674    2.2603    0.0000 C   0  0  0  0  0  0  0  0  0  0  0  0
   -1.0124   -1.5299    0.0000 H   0  0  0  0  0  0  0  0  0  0  0  0
    3.1374    1.0152    0.0000 O   0  0  0  0  0  0  0  0  0  0  0  0
    3.7269    0.6749    0.0000 C   0  0  0  0  0  0  0  0  0  0  0  0
   -0.0069   -2.2398    0.0000 O   0  0  0  0  0  0  0  0  0  0  0  0
   -0.7214   -1.0023    0.0000 O   0  0  0  0  0  0  0  0  0  0  0  0
   -0.7214   -1.8273    0.0000 C   0  0  0  0  0  0  0  0  0  0  0  0
   -1.4359   -2.2398    0.0000 C   0  0  0  0  0  0  0  0  0  0  0  0
  1  2  1  0      
  2  3  1  0      
  3  4  1  0      
  4  5  1  0      
  5  6  1  0      
  6  1  1  0      
  4  7  1  0      
  7  8  1  0      
  8  9  1  0      
  9  5  1  0      
  7 10  1  0      
 10 11  1  0      
 11 12  1  0      
 12 13  1  0      
 13 14  1  0      
 14 15  1  0      
 15  9  1  0      
  6 16  2  0      
  3 17  1  1      
  4 18  1  1      
  5 19  1  1      
 10 20  1  0      
 17 21  1  0      
 17 22  1  0      
  1 23  1  6      
  9 24  1  6      
 14 25  1  6      
 14 26  1  0      
  7 27  1  6      
 28 29  1  0      
 13 28  1  0      
 10 30  1  1      
 30 32  1  0      
 31 32  2  0      
 32 33  1  0      
M  STY  1   1 SUP
M  SLB  1   1   1
M  SAL   1  2  28  29
M  SBL   1  1  31
M  SMT   1 OMe
M  SBV   1 31   -6.8520    6.0608
M  STY  1   2 SUP
M  SLB  1   2   2
M  SAL   2  4  30  31  32  33
M  SBL   2  1  32
M  SMT   2 OAc
M  SBV   2 32   -7.7175    5.0846
M  END
