# Supplementary material for: Krempfielins J–M, New Eunicellin-Based Diterpenoids from the Soft Coral Cladiella krempfi
Source: MDPI journal article supplement (doi:10.3390/md11082741), 2013-08-02
Supplement: s3 [file s3]

marinedrugs-11-02741-s002.mol
  corina  04141402413D 1   1.00000     0.00000 
CORINA 3.49 0023  12.04.2013
 38 40  0  0  0  0  0  0  0  0999 V2000
    0.9119    2.2921   -0.3329 C   0  0  0  0  0  0  0  0  0  0  0  0
    0.5599    0.8292   -0.0706 C   0  0  0  0  0  0  0  0  0  0  0  0
    1.2074   -0.0742   -1.1361 C   0  0  0  0  0  0  0  0  0  0  0  0
    2.7114    0.0375   -1.0981 C   0  0  0  0  0  0  0  0  0  0  0  0
    3.1801    1.5097   -1.3157 C   0  0  0  0  0  0  0  0  0  0  0  0
    2.4199    2.3897   -0.3377 C   0  0  0  0  0  0  0  0  0  0  0  0
    5.4637    1.2809   -3.3156 C   0  0  0  0  0  0  0  0  0  0  0  0
    4.0737    1.7132   -3.8074 C   0  0  0  0  0  0  0  0  0  0  0  0
    3.1111    2.1032   -2.6724 C   0  0  0  0  0  0  0  0  0  0  0  0
    0.7796   -1.5067   -0.7722 C   0  0  0  0  0  0  0  0  0  0  0  0
    3.5096   -0.7028   -2.1465 C   0  0  0  0  0  0  0  0  0  0  0  0
    5.5936   -0.2078   -2.9849 C   0  0  0  0  0  0  0  0  0  0  0  0
    3.0287   -1.7893   -3.0638 C   0  0  0  0  0  0  0  0  0  0  0  0
    4.8996   -0.7115   -1.8588 O   0  0  0  0  0  0  0  0  0  0  0  0
    5.3109   -1.1533   -4.1490 C   0  0  0  0  0  0  0  0  0  0  0  0
    4.2301   -2.1929   -3.9527 C   0  0  0  0  0  0  0  0  0  0  0  0
    1.8388   -1.3539   -3.9176 C   0  0  0  0  0  0  0  0  0  0  0  0
    2.6372   -2.9538   -2.2593 O   0  0  0  0  0  0  0  0  0  0  0  0
    3.0702   -0.3057   -0.1069 H   0  0  0  0  0  0  0  0  0  0  0  0
    4.2352    1.5582   -0.9695 H   0  0  0  0  0  0  0  0  0  0  0  0
    6.6693   -0.3552   -2.7504 H   0  0  0  0  0  0  0  0  0  0  0  0
    5.8392    2.0641   -2.1773 O   0  0  0  0  0  0  0  0  0  0  0  0
    3.1796    3.5284   -2.5501 O   0  0  0  0  0  0  0  0  0  0  0  0
    1.3970   -1.8973    0.5721 C   0  0  0  0  0  0  0  0  0  0  0  0
   -0.7456   -1.5734   -0.6715 C   0  0  0  0  0  0  0  0  0  0  0  0
    3.4981    0.8462   -4.7557 O   0  0  0  0  0  0  0  0  0  0  0  0
    3.5030    0.1051   -2.8969 H   0  0  0  0  0  0  0  0  0  0  0  0
    0.3727    2.7466   -1.5975 O   0  0  0  0  0  0  0  0  0  0  0  0
    3.0548    3.1919    0.4727 C   0  0  0  0  0  0  0  0  0  0  0  0
    0.0506    4.0463   -1.6908 C   0  0  0  0  0  0  0  0  0  0  0  0
   -0.5161    4.5918   -2.9763 C   0  0  0  0  0  0  0  0  0  0  0  0
    0.2149    4.7789   -0.7442 O   0  0  0  0  0  0  0  0  0  0  0  0
    2.2800   -4.0627   -2.9260 C   0  0  0  0  0  0  0  0  0  0  0  0
    1.7688   -5.2633   -2.1721 C   0  0  0  0  0  0  0  0  0  0  0  0
    1.5660   -6.4274   -3.1441 C   0  0  0  0  0  0  0  0  0  0  0  0
    1.0470   -7.6463   -2.3787 C   0  0  0  0  0  0  0  0  0  0  0  0
    2.3684   -4.0984   -4.1304 O   0  0  0  0  0  0  0  0  0  0  0  0
    6.4743    1.6229   -4.4288 C   0  0  0  0  0  0  0  0  0  0  0  0
  1  2  1  0      
  2  3  1  0      
  3  4  1  0      
  4  5  1  0      
  5  6  1  0      
  6  1  1  0      
  7  8  1  0      
  8  9  1  0      
  9  5  1  0      
 11  4  1  0      
  7 12  1  0      
 11 13  1  0      
 11 14  1  0      
 14 12  1  0      
 12 15  1  0      
 15 16  1  0      
 13 16  1  0      
 13 17  1  0      
 13 18  1  0      
  4 19  1  0      
  5 20  1  0      
 12 21  1  0      
  7 22  1  0      
  9 23  1  0      
  3 10  1  0      
 10 24  1  0      
 10 25  1  0      
  8 26  1  0      
 11 27  1  0      
  1 28  1  0      
  6 29  2  0      
 28 30  1  0      
 30 31  1  0      
 30 32  2  0      
 18 33  1  0      
 33 34  1  0      
 34 35  1  0      
 35 36  1  0      
 33 37  2  0      
  7 38  1  0      
M  END
$$$$
