# Supplementary material for: Krempfielins J–M, New Eunicellin-Based Diterpenoids from the Soft Coral Cladiella krempfi
Source: MDPI journal article supplement (doi:10.3390/md11082741), 2013-08-02
Supplement: s4 [file s4]

marinedrugs-11-02741-s002.mol
  ChemDraw12271311382D

 38 40  0  0  0  0  0  0  0  0999 V2000
   -1.6425    1.3855    0.0000 C   0  0  0  0  0  0  0  0  0  0  0  0
   -1.6425    0.5605    0.0000 C   0  0  0  0  0  0  0  0  0  0  0  0
   -0.9280    0.1480    0.0000 C   0  0  0  0  0  0  0  0  0  0  0  0
   -0.2135    0.5605    0.0000 C   0  0  0  0  0  0  0  0  0  0  0  0
   -0.2135    1.3855    0.0000 C   0  0  0  0  0  0  0  0  0  0  0  0
   -0.9280    1.7980    0.0000 C   0  0  0  0  0  0  0  0  0  0  0  0
    1.7782    1.3855    0.0000 C   0  0  0  0  0  0  0  0  0  0  0  0
    1.1948    1.9688    0.0000 C   0  0  0  0  0  0  0  0  0  0  0  0
    0.3698    1.9688    0.0000 C   0  0  0  0  0  0  0  0  0  0  0  0
   -0.9280   -0.6770    0.0000 C   0  0  0  0  0  0  0  0  0  0  0  0
    0.5009    0.1480    0.0000 C   0  0  0  0  0  0  0  0  0  0  0  0
    1.8151    0.7048    0.0000 C   0  0  0  0  0  0  0  0  0  0  0  0
    0.8045   -0.5739    0.0000 C   0  0  0  0  0  0  0  0  0  0  0  0
    0.9134    0.8624    0.0000 O   0  0  0  0  0  0  0  0  0  0  0  0
    2.1658   -0.0583    0.0000 C   0  0  0  0  0  0  0  0  0  0  0  0
    1.7120   -0.6977    0.0000 C   0  0  0  0  0  0  0  0  0  0  0  0
   -0.0824   -0.8624    0.0000 C   0  0  0  0  0  0  0  0  0  0  0  0
    0.9280   -1.4458    0.0000 O   0  0  0  0  0  0  0  0  0  0  0  0
   -0.9280    0.9730    0.0000 H   0  0  0  0  0  0  0  0  0  0  0  0
    0.5009    0.9730    0.0000 H   0  0  0  0  0  0  0  0  0  0  0  0
    2.7886    0.3751    0.0000 H   0  0  0  0  0  0  0  0  0  0  0  0
    2.5751    1.1719    0.0000 O   0  0  0  0  0  0  0  0  0  0  0  0
   -0.0427    2.6833    0.0000 O   0  0  0  0  0  0  0  0  0  0  0  0
   -1.5114   -1.2604    0.0000 C   0  0  0  0  0  0  0  0  0  0  0  0
   -0.3446   -1.2604    0.0000 C   0  0  0  0  0  0  0  0  0  0  0  0
    1.6073    2.6833    0.0000 O   0  0  0  0  0  0  0  0  0  0  0  0
   -0.0824   -0.4354    0.0000 H   0  0  0  0  0  0  0  0  0  0  0  0
   -2.3569    1.7980    0.0000 O   0  0  0  0  0  0  0  0  0  0  0  0
   -0.9280    2.6230    0.0000 C   0  0  0  0  0  0  0  0  0  0  0  0
   -3.0714    1.3855    0.0000 C   0  0  0  0  0  0  0  0  0  0  0  0
   -3.7859    1.7980    0.0000 C   0  0  0  0  0  0  0  0  0  0  0  0
   -3.0714    0.5605    0.0000 O   0  0  0  0  0  0  0  0  0  0  0  0
    1.6425   -1.8583    0.0000 C   0  0  0  0  0  0  0  0  0  0  0  0
    2.3569   -1.4458    0.0000 C   0  0  0  0  0  0  0  0  0  0  0  0
    3.0714   -1.8583    0.0000 C   0  0  0  0  0  0  0  0  0  0  0  0
    3.7859   -1.4458    0.0000 C   0  0  0  0  0  0  0  0  0  0  0  0
    1.6425   -2.6833    0.0000 O   0  0  0  0  0  0  0  0  0  0  0  0
    2.3616    1.9688    0.0000 C   0  0  0  0  0  0  0  0  0  0  0  0
  1  2  1  0      
  2  3  1  0      
  3  4  1  0      
  4  5  1  0      
  5  6  1  0      
  6  1  1  0      
  7  8  1  0      
  8  9  1  0      
  9  5  1  0      
 11  4  1  0      
  7 12  1  0      
 11 13  1  0      
 11 14  1  0      
 14 12  1  0      
 12 15  1  0      
 15 16  1  0      
 13 16  1  0      
 13 17  1  0      
 13 18  1  1      
  4 19  1  1      
  5 20  1  1      
 12 21  1  1      
  7 22  1  1      
  9 23  1  1      
  3 10  1  1      
 10 24  1  0      
 10 25  1  0      
  8 26  1  6      
 11 27  1  6      
  1 28  1  6      
  6 29  2  0      
 28 30  1  0      
 30 31  1  0      
 30 32  2  0      
 18 33  1  0      
 33 34  1  0      
 34 35  1  0      
 35 36  1  0      
 33 37  2  0      
  7 38  1  0      
M  END
