# Supplementary material for: Krempfielins J–M, New Eunicellin-Based Diterpenoids from the Soft Coral Cladiella krempfi
Source: MDPI journal article supplement (doi:10.3390/md11082741), 2013-08-02
Supplement: s5 [file s5]

marinedrugs-11-02741-s003.mol
  corina  04141402413D 1   1.00000     0.00000 
CORINA 3.49 0023  12.04.2013
 34 36  0  0  0  0  0  0  0  0999 V2000
   -0.1414    0.2197    0.1843 C   0  0  0  0  0  0  0  0  0  0  0  0
    0.9052   -0.6943    0.8325 C   0  0  0  0  0  0  0  0  0  0  0  0
    1.9480   -1.0185   -0.2330 C   0  0  0  0  0  0  0  0  0  0  0  0
    2.7462    0.2066   -0.6921 C   0  0  0  0  0  0  0  0  0  0  0  0
    1.8158    1.3352   -1.1772 C   0  0  0  0  0  0  0  0  0  0  0  0
    0.6098    1.4492   -0.2500 C   0  0  0  0  0  0  0  0  0  0  0  0
    3.4219   -0.2856   -1.9874 C   0  0  0  0  0  0  0  0  0  0  0  0
    2.1677   -0.3336   -2.7815 O   0  0  0  0  0  0  0  0  0  0  0  0
    1.4447    0.8981   -2.5653 C   0  0  0  0  0  0  0  0  0  0  0  0
    4.1061    1.1020   -2.4608 C   0  0  0  0  0  0  0  0  0  0  0  0
    3.3691    0.8583   -3.9490 C   0  0  0  0  0  0  0  0  0  0  0  0
    4.4357    1.2639   -5.0737 C   0  0  0  0  0  0  0  0  0  0  0  0
    3.2263    2.3410   -5.3857 C   0  0  0  0  0  0  0  0  0  0  0  0
    1.8825    1.7000   -5.0356 C   0  0  0  0  0  0  0  0  0  0  0  0
    0.9612    1.7465   -3.7914 C   0  0  0  0  0  0  0  0  0  0  0  0
    0.2371    2.6381    0.1666 C   0  0  0  0  0  0  0  0  0  0  0  0
    2.9170   -2.0629    0.3329 C   0  0  0  0  0  0  0  0  0  0  0  0
    3.4805    0.5306    0.0559 H   0  0  0  0  0  0  0  0  0  0  0  0
    2.2233    2.3453   -1.1291 H   0  0  0  0  0  0  0  0  0  0  0  0
    3.4511    3.5595   -4.6655 O   0  0  0  0  0  0  0  0  0  0  0  0
    3.8665    2.3651   -1.9322 O   0  0  0  0  0  0  0  0  0  0  0  0
    5.6201    0.8261   -2.6164 C   0  0  0  0  0  0  0  0  0  0  0  0
    3.4851   -1.5637    1.6630 C   0  0  0  0  0  0  0  0  0  0  0  0
    2.1722   -3.3802    0.5588 C   0  0  0  0  0  0  0  0  0  0  0  0
    0.4366    0.4431   -2.3169 H   0  0  0  0  0  0  0  0  0  0  0  0
    1.8101    0.3869   -5.5849 O   0  0  0  0  0  0  0  0  0  0  0  0
    0.9520    2.4425   -6.0596 C   0  0  0  0  0  0  0  0  0  0  0  0
    4.0356   -1.1630   -1.9611 H   0  0  0  0  0  0  0  0  0  0  0  0
   -0.3426    1.2901   -4.1801 O   0  0  0  0  0  0  0  0  0  0  0  0
    4.5583    3.3875   -2.4592 C   0  0  0  0  0  0  0  0  0  0  0  0
    4.3909    4.7775   -1.9014 C   0  0  0  0  0  0  0  0  0  0  0  0
    5.2852    5.7485   -2.6749 C   0  0  0  0  0  0  0  0  0  0  0  0
    5.1153    7.1596   -2.1085 C   0  0  0  0  0  0  0  0  0  0  0  0
    5.3151    3.1935   -3.3809 O   0  0  0  0  0  0  0  0  0  0  0  0
  1  2  1  0      
  2  3  1  0      
  3  4  1  0      
  4  5  1  0      
  5  6  1  0      
  6  1  1  0      
  4  7  1  0      
  7  8  1  0      
  8  9  1  0      
  9  5  1  0      
  7 10  1  0      
 10 11  1  0      
 11 12  1  0      
 12 13  1  0      
 13 14  1  0      
 14 15  1  0      
 15  9  1  0      
  6 16  2  0      
  3 17  1  0      
  4 18  1  0      
  5 19  1  0      
 13 20  1  0      
 10 21  1  0      
 10 22  1  0      
 17 23  1  0      
 17 24  1  0      
  9 25  1  0      
 14 26  1  0      
 14 27  1  0      
  7 28  1  0      
 15 29  1  0      
 21 30  1  0      
 30 31  1  0      
 31 32  1  0      
 32 33  1  0      
 30 34  2  0      
M  END
$$$$
