# Supplementary material for: Krempfielins J–M, New Eunicellin-Based Diterpenoids from the Soft Coral Cladiella krempfi
Source: MDPI journal article supplement (doi:10.3390/md11082741), 2013-08-02
Supplement: s6 [file s6]

marinedrugs-11-02741-s003.mol
  ChemDraw12271311382D

 34 36  0  0  0  0  0  0  0  0999 V2000
   -3.2139    1.0312    0.0000 C   0  0  0  0  0  0  0  0  0  0  0  0
   -3.2139    0.2062    0.0000 C   0  0  0  0  0  0  0  0  0  0  0  0
   -2.4995   -0.2063    0.0000 C   0  0  0  0  0  0  0  0  0  0  0  0
   -1.7850    0.2062    0.0000 C   0  0  0  0  0  0  0  0  0  0  0  0
   -1.7850    1.0312    0.0000 C   0  0  0  0  0  0  0  0  0  0  0  0
   -2.4995    1.4437    0.0000 C   0  0  0  0  0  0  0  0  0  0  0  0
   -1.0004   -0.0487    0.0000 C   0  0  0  0  0  0  0  0  0  0  0  0
   -0.5154    0.6188    0.0000 O   0  0  0  0  0  0  0  0  0  0  0  0
   -1.0004    1.2862    0.0000 C   0  0  0  0  0  0  0  0  0  0  0  0
   -0.0565   -0.9926    0.0000 C   0  0  0  0  0  0  0  0  0  0  0  0
    1.2784   -0.9926    0.0000 C   0  0  0  0  0  0  0  0  0  0  0  0
    2.2223   -0.0487    0.0000 C   0  0  0  0  0  0  0  0  0  0  0  0
    2.2223    1.2862    0.0000 C   0  0  0  0  0  0  0  0  0  0  0  0
    1.2784    2.2301    0.0000 C   0  0  0  0  0  0  0  0  0  0  0  0
   -0.0565    2.2301    0.0000 C   0  0  0  0  0  0  0  0  0  0  0  0
   -2.4995    2.2687    0.0000 C   0  0  0  0  0  0  0  0  0  0  0  0
   -2.4995   -1.0313    0.0000 C   0  0  0  0  0  0  0  0  0  0  0  0
   -1.7850   -0.6188    0.0000 H   0  0  0  0  0  0  0  0  0  0  0  0
   -1.7850    1.8562    0.0000 H   0  0  0  0  0  0  0  0  0  0  0  0
    2.9368    1.6987    0.0000 O   0  0  0  0  0  0  0  0  0  0  0  0
    0.3560   -1.7071    0.0000 O   0  0  0  0  0  0  0  0  0  0  0  0
   -0.6398   -1.5760    0.0000 C   0  0  0  0  0  0  0  0  0  0  0  0
   -3.2139   -1.4438    0.0000 C   0  0  0  0  0  0  0  0  0  0  0  0
   -1.7850   -1.4438    0.0000 C   0  0  0  0  0  0  0  0  0  0  0  0
   -1.4129    2.0007    0.0000 H   0  0  0  0  0  0  0  0  0  0  0  0
    1.8618    2.8135    0.0000 O   0  0  0  0  0  0  0  0  0  0  0  0
    0.8659    2.9446    0.0000 C   0  0  0  0  0  0  0  0  0  0  0  0
   -1.2139   -0.8456    0.0000 H   0  0  0  0  0  0  0  0  0  0  0  0
   -0.6398    2.8135    0.0000 O   0  0  0  0  0  0  0  0  0  0  0  0
    1.0705   -2.1196    0.0000 C   0  0  0  0  0  0  0  0  0  0  0  0
    1.7850   -1.7071    0.0000 C   0  0  0  0  0  0  0  0  0  0  0  0
    2.4995   -2.1196    0.0000 C   0  0  0  0  0  0  0  0  0  0  0  0
    3.2139   -1.7071    0.0000 C   0  0  0  0  0  0  0  0  0  0  0  0
    1.0705   -2.9446    0.0000 O   0  0  0  0  0  0  0  0  0  0  0  0
  1  2  1  0      
  2  3  1  0      
  3  4  1  0      
  4  5  1  0      
  5  6  1  0      
  6  1  1  0      
  4  7  1  0      
  7  8  1  0      
  8  9  1  0      
  9  5  1  0      
  7 10  1  0      
 10 11  1  0      
 11 12  1  0      
 12 13  1  0      
 13 14  1  0      
 14 15  1  0      
 15  9  1  0      
  6 16  2  0      
  3 17  1  1      
  4 18  1  1      
  5 19  1  1      
 13 20  1  1      
 10 21  1  1      
 10 22  1  0      
 17 23  1  0      
 17 24  1  0      
  9 25  1  6      
 14 26  1  6      
 14 27  1  0      
  7 28  1  6      
 15 29  1  6      
 21 30  1  0      
 30 31  1  0      
 31 32  1  0      
 32 33  1  0      
 30 34  2  0      
M  END
